# Supplementary material for: A para-azaquinodimethane integrated quinoidal conjugated microporous polymer
Source: Royal Society of Chemistry journal article supplement (doi:10.1039/d3tc02233a), 2023-10-27
Supplement: d3tc02233a1.pdf [file d3tc02233a1.pdf]

## Electronic Supplementary Information

### ***Para*-Azaquinodimethane Integrated Quinoidal Conjugated Microporous Polymer**

Aswani Raj K and Rajeswara Rao M\*  
Department of Chemistry, IIT Dharwad, Karnataka-580011, India  
Email: rajesh@iitdh.ac.in

#### **Contents**

|                                   |   |
|-----------------------------------|---|
| Materials and measurements.....   | 2 |
| Experimental Section.....         | 2 |
| Electrochemical measurement ..... | 2 |
| Characterisation .....            | 3 |

#### **List of Figures**

|                                                                                                                     |   |
|---------------------------------------------------------------------------------------------------------------------|---|
| <b>Fig. S1:</b> FT-IR spectra of model compounds <b>MnQ1</b> , <b>MQ1</b> and polymers <b>nQ1</b> , <b>Q1</b> ..... | 3 |
| <b>Fig. S2:</b> FT-IR spectra of <b>PA</b> , <b>MnQ1</b> and <b>nQ1</b> b) Raman spectra of <b>Q1</b> .....         | 4 |
| <b>Fig. S3:</b> FE-SEM images of a) <b>nQ1</b> and b) <b>Q1</b> and c) HR-TEM images of <b>Q1</b> . ....            | 4 |
| <b>Fig. S4:</b> AFM image of <b>Q1</b> .....                                                                        | 5 |
| <b>Fig. S5:</b> Thermogravimetric analysis of <b>nQ1</b> and <b>Q1</b> . ....                                       | 5 |
| <b>Fig. S6:</b> Powder XRD of a) <b>nQ1</b> and b) <b>Q1</b> . ....                                                 | 6 |
| <b>Fig. S7:</b> Nitrogen adsorption and desorption isotherms of a) <b>nQ1</b> and b) <b>Q1</b> .....                | 6 |
| <b>Fig. S8:</b> DFT-optimized HOCO and LUCO of <b>nQ1</b> and <b>Q1</b> . ....                                      | 7 |
| <b>Fig. S9:</b> Imine based polymer .....                                                                           | 7 |
| <b>Fig. S10:</b> Comparison of the UV-Vis absorption spectra of <b>nQ1</b> with <b>Q1</b> in TFA and iodine. ....   | 8 |

**S**

## Materials and measurements

All chemicals and solvents were purchased from commercial suppliers and used without further purification unless otherwise specified.  $^{13}\text{C}$ -CPMAS NMR (100 MHz) and  $^{13}\text{C}$  NMR (100 MHz) spectra were recorded in deuterated solvents on a Jeol Resonance ECZ-400R Spectrometer. Quoted chemical shifts are in ppm downfield from tetramethylsilane (TMS) reference using the residual protonated solvents as an internal standard. Ultraviolet- visible (UV-vis) spectra were measured with Agilent Cary 5000 UV-Vis-NIR spectrophotometer. Electrochemical studies were done using Gamry, INTERFACE1010 31184 in three electrode system were Pt wire as a counter electrode, Ag/AgCl as a reference electrode and Glassy carbon as a working electrode. Tetrabutylammonium perchlorate as an electrolyte and HPLC grade dichloromethane as a solvent. Finally, the redox potentials were modified with reference to the ferrocene ( $\text{Fc}/\text{Fc}^+$ ). The HOMOs are calculated as  $\text{HOMO} = -(4.8 + \text{oxd. potential})$  and LUMO as  $\text{LUMO} = -(4.8 + \text{red. potential})$ .

## Experimental Section

### Synthetic procedure for polymer (**nQ1**):

To a mixture of tris-(4-formylphenyl) amine (1 eq.) and N, N-diacetyl-piperazine- 2,5-dione (1.5 eq.) and  $\text{K}_2\text{CO}_3$  (4 eq.), DMF (5 mL) was syringe injected under  $\text{N}_2$  atmosphere. The reaction mixture was stirred at 100 °C for 4 days. The reaction mixture is cooled to room temperature, poured into ice-cooled water, the precipitate was collected by filtration and washed with DMF, water, methanol. The insoluble solid of diarylidene-diketopiperazine polymer (**nQ1**) was used for the next step after soxhlet extraction with tetrahydrofuran.

### Synthetic procedure for *p*-azaquinodimethanes polymer (**Q1**):

A mixture of **nQ1** (1 eq.),  $\text{K}_2\text{CO}_3$  (5 eq.) and alkyl bromide (4 eq.) in DMF (10 mL) was stirred at room temperature for 2 days under  $\text{N}_2$ . The reaction mixture was poured into water and filtered the solid and washed with DMF, plenty of water, methanol, and acetone.

## Electrochemical measurement

Electrode Fabrication: For electrochemical measurements, glassy carbon electrode was coated with active materials (polymers **nQ1** or **Q1**). The material paste is made in 500  $\mu\text{l}$  NMP, polymer (5 mg), Nafion binder (100  $\mu\text{l}$ ), and carbon black (0.66 mg) were added. The solution was stirred for 16 h to make the solution homogeneous. In the next step, 0.1  $\mu\text{l}$  of the solution was drop casted on the glassy carbon electrode. Finally, the electrode was vacuum dried for 1-2 hrs.

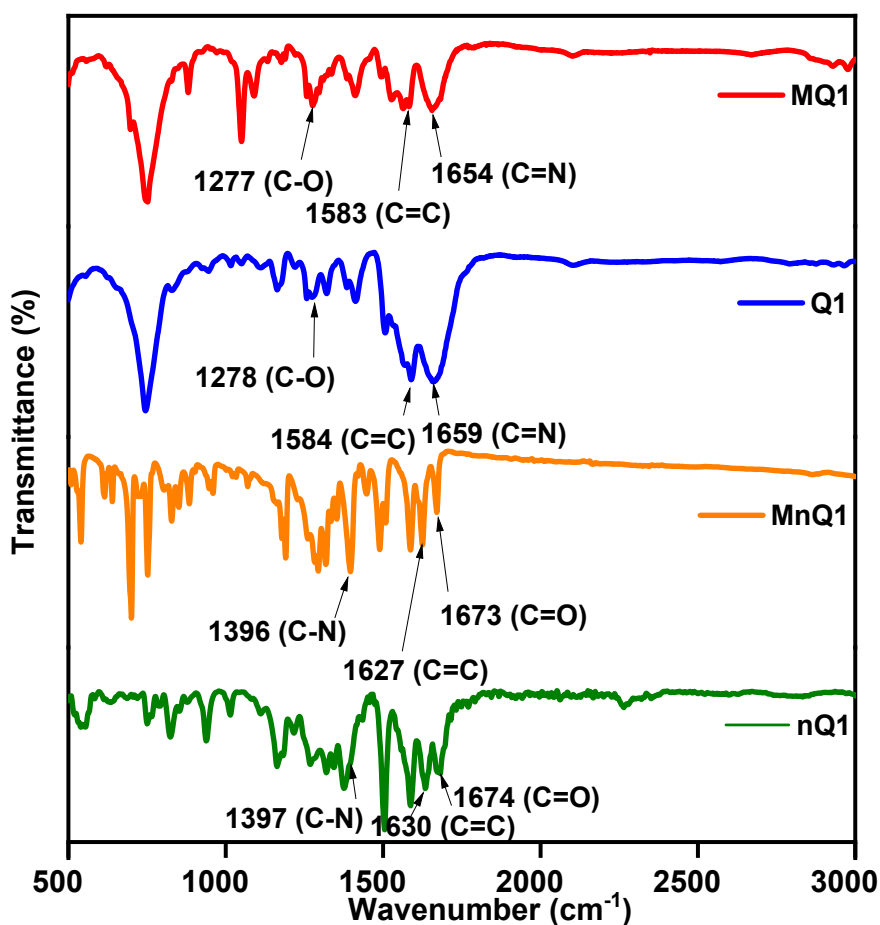

**Fig. S1:** FT-IR spectra of model compounds **MnQ1**, **MQ1** and polymers **nQ1**, **Q1**

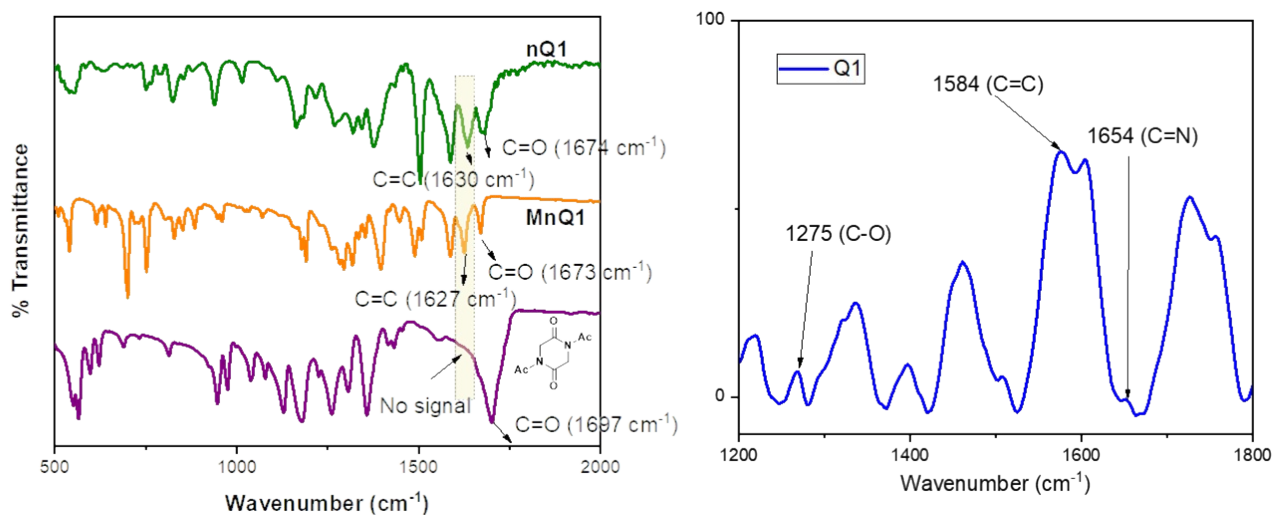

**Fig. S2:** a) FT-IR spectra of PA, MnQ1 and nQ1 b) Raman spectra of Q1.

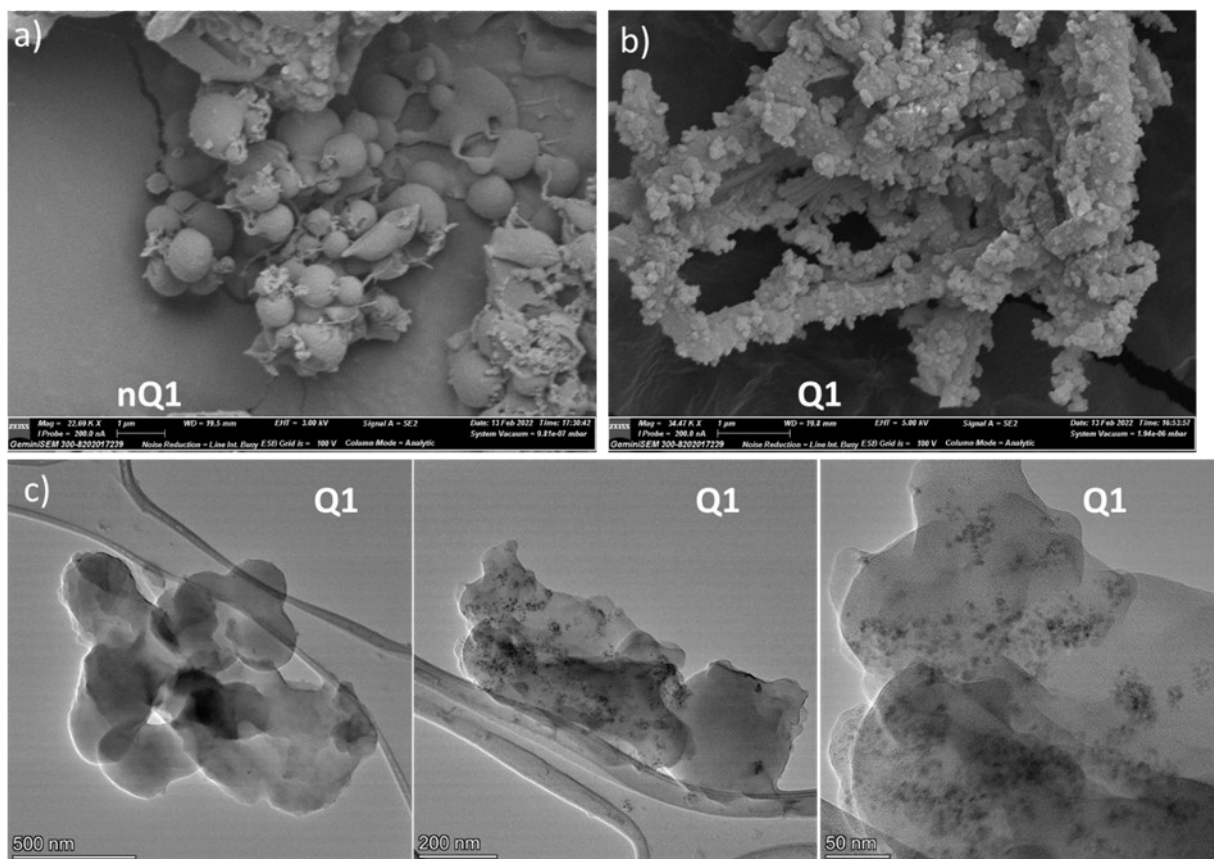

**Fig. S3:** FE-SEM images of a) nQ1 and b) Q1 and c) HR-TEM images of Q1.

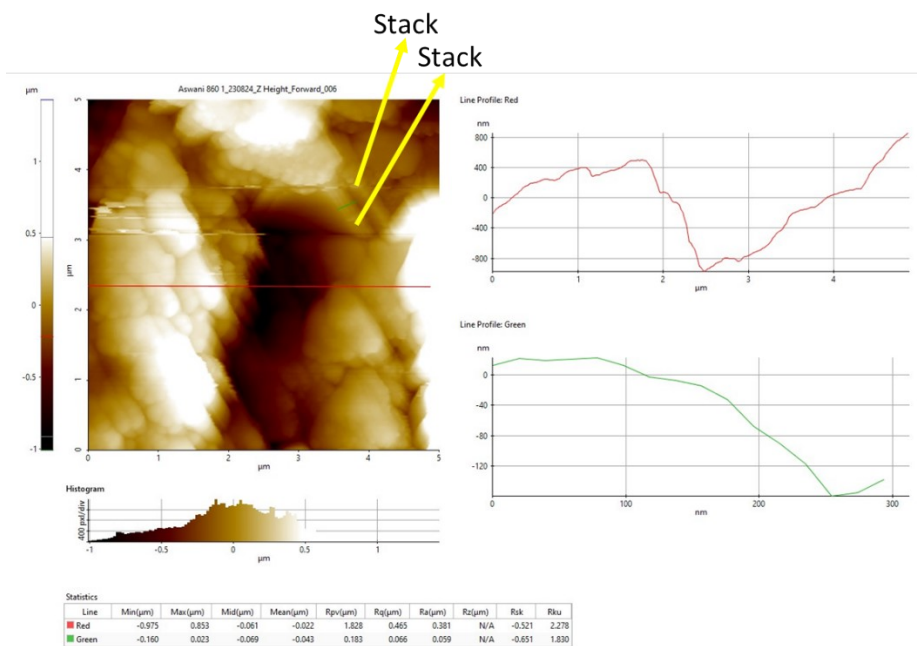

**Fig. S4: AFM image of Q1**

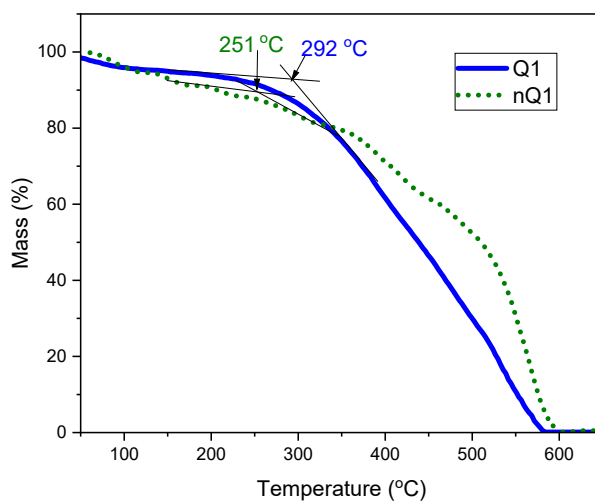

**Fig. S5: Thermogravimetric analysis of nQ1 and Q1.**

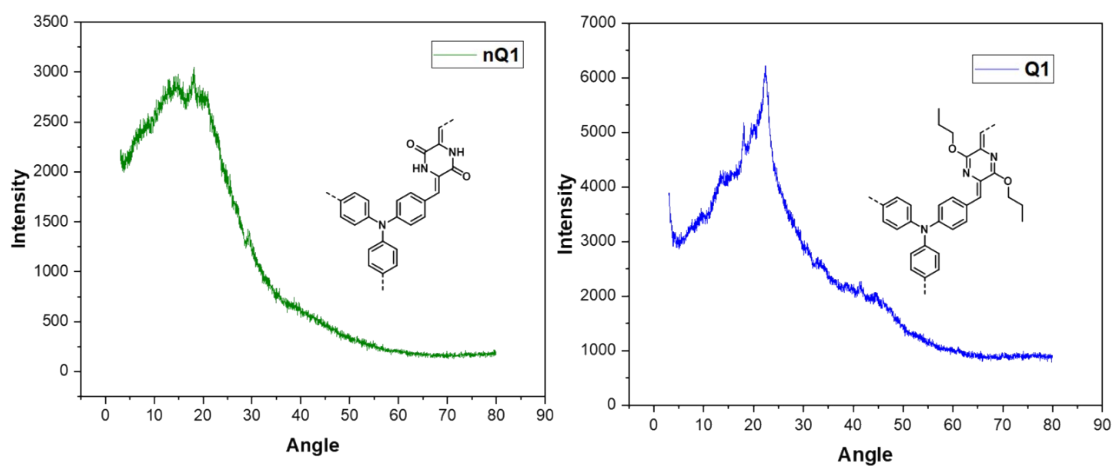

**Fig. S6:** Powder XRD of a) nQ1 and b) Q1.

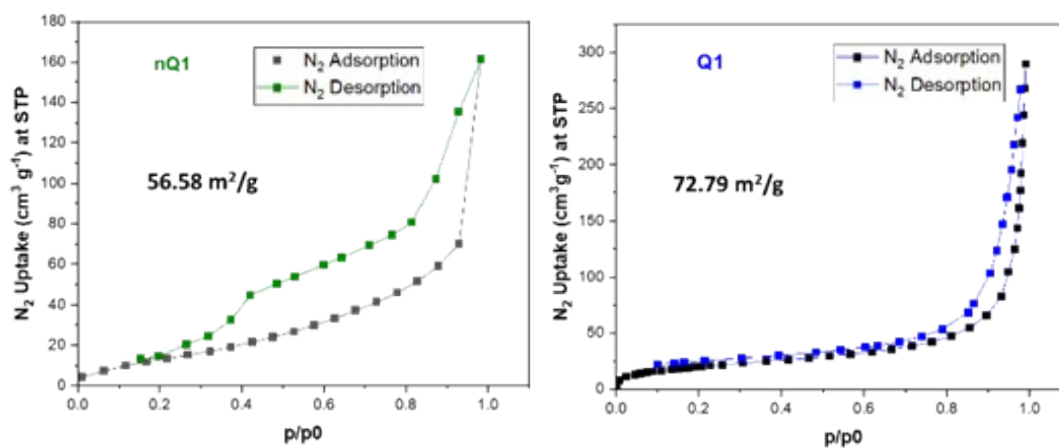

**Fig. S7:** Nitrogen adsorption and desorption isotherms of a) nQ1 and b) Q1.

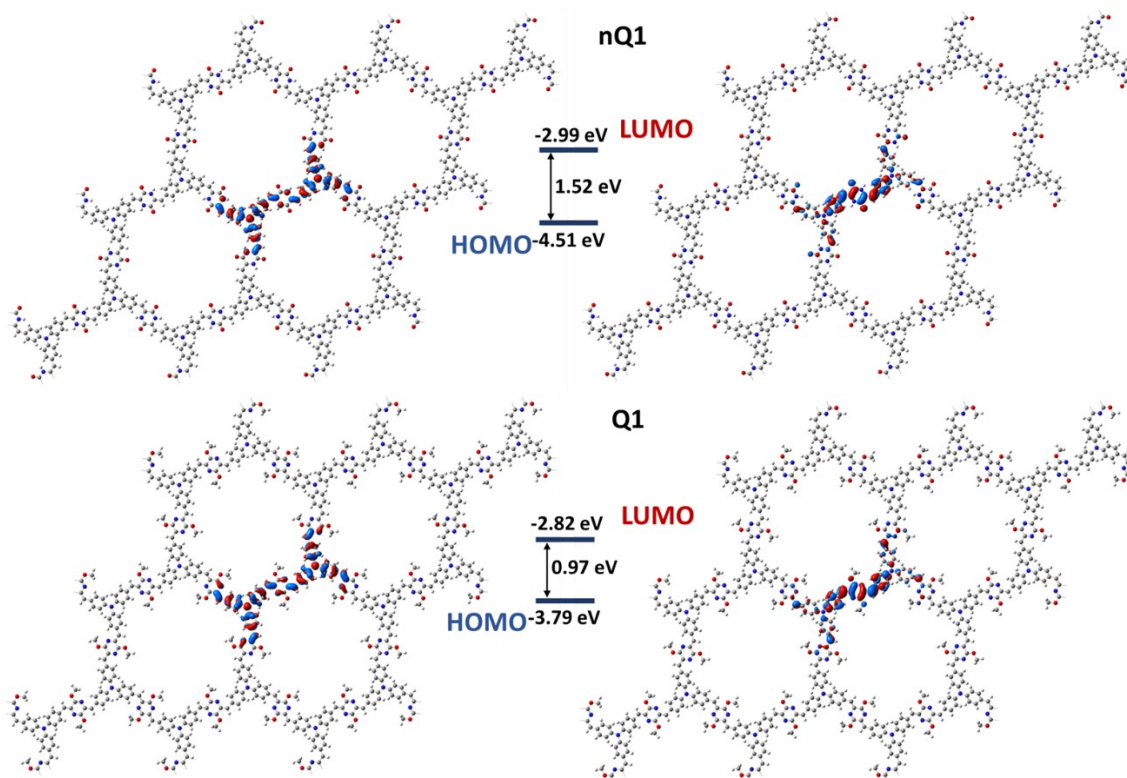

**Fig. S8:** DFT-optimized HOCO and LUCO of **nQ1** and **Q1**.

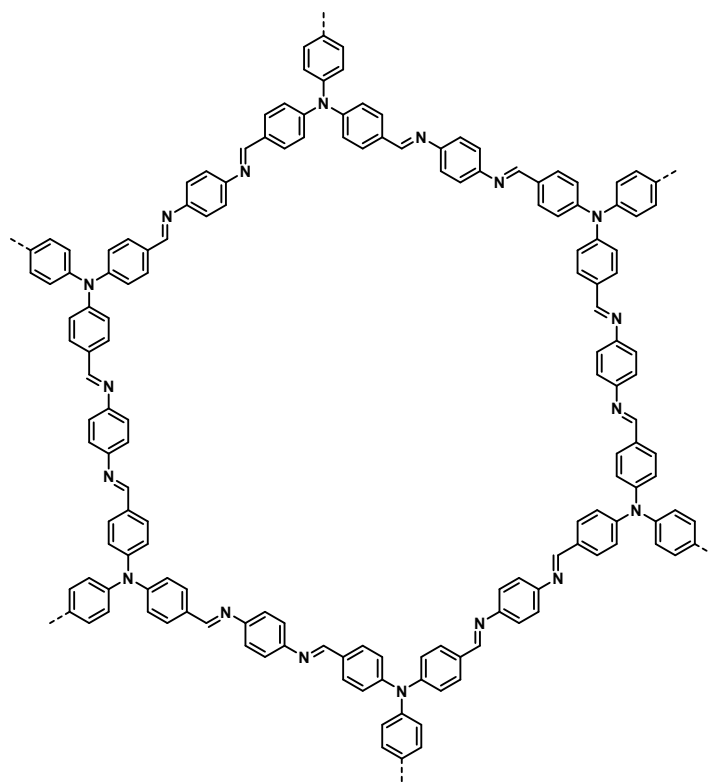

**Fig. S9:** Imine based polymer (**M1-P**)

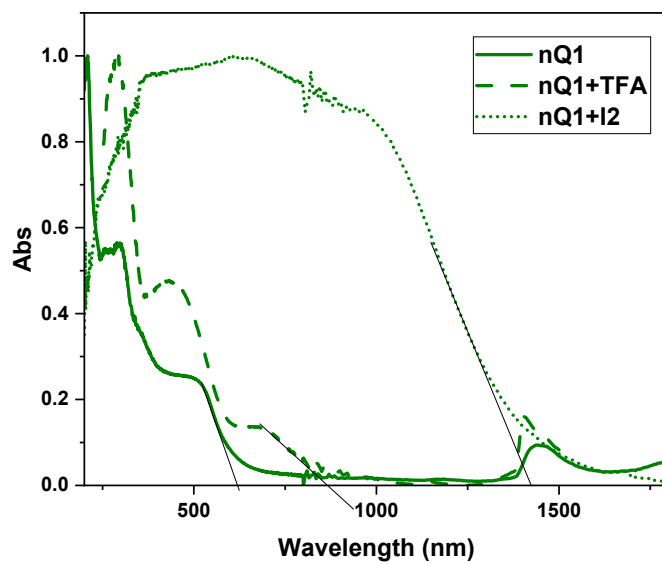

**Fig. S10:** Comparison of the UV-Vis absorption spectra of **nQ1** with **nQ1** in TFA and iodine.
